# Supplementary material
Source: HighWire-hosted journal article supplement (https://www.annfammed.org/highwire/filestream/16294/field_highwire_adjunct_files/0/Nessl-Supp-Table.pdf)
Supplement: Nessl-Supp-Table.pdf [file Nessl-Supp-Table.pdf]

## Supplemental materials for

Nessle C, Ghazal LV, Choi SW, Feters MD. Joint display of integrated data collection for mixed methods research: an illustration from a pediatric oncology quality improvement study. *Ann Fam Med*. 2023;21(4):347-357.

**Supplemental Table 1. Mixed Methods Data Sources**

| Type                                                                                     | What                                                                                                                                                                                                                                                                                                                                                                                                                                                                        |                                                                                                                                                                                                                                                                                                                                                                                                                                                                                                                                                                                                               | How many                                                      |
|------------------------------------------------------------------------------------------|-----------------------------------------------------------------------------------------------------------------------------------------------------------------------------------------------------------------------------------------------------------------------------------------------------------------------------------------------------------------------------------------------------------------------------------------------------------------------------|---------------------------------------------------------------------------------------------------------------------------------------------------------------------------------------------------------------------------------------------------------------------------------------------------------------------------------------------------------------------------------------------------------------------------------------------------------------------------------------------------------------------------------------------------------------------------------------------------------------|---------------------------------------------------------------|
| Demographic & Clinical course from manual chart abstraction of medical record            | Demographics <ul style="list-style-type: none"><li>Name</li><li>Age</li><li>Gender</li><li>Ethnicity</li></ul> Clinical episode characteristics <ul style="list-style-type: none"><li>MDI diagnosed? (URI, UTI, fungal, C. diff, BSI, clinical like typhlitis, etc.)</li><li>BSI organism</li><li>Time-to-positivity</li><li>PCT values at time 0, 1, 2</li><li>CRP values time 0, 1, 2</li></ul> Infection related mortality                                               | Clinical episodes characteristics, cont'd <ul style="list-style-type: none"><li>Length of stay</li><li>Length of IV antibiotics</li><li>Length of neutropenia</li><li>Length of fever</li><li>PICU admission</li><li>Readmission</li><li>Type of CVL (port, PICC, broviac)</li><li>Number of lumens in CVL</li><li>Hx BMT &lt;12mo</li></ul> Risk assignment: <ul style="list-style-type: none"><li>Risk assignment at presentation</li><li>Risk assignment after one night observation</li></ul>                                                                                                             | 2 years, n=300                                                |
| Oncologic history & Clinical course from manual chart abstraction of medical record (#2) | Oncologic history: <ul style="list-style-type: none"><li>Primary diagnosis</li><li>Date of dx</li><li>Phase of therapy</li><li>Disease status</li></ul> PICU admission: <ul style="list-style-type: none"><li>Related to FN</li><li>Non-infectious concern</li><li>Disease status</li><li>LOS ≤3 days</li><li>Acute respiratory failure present</li><li>Need for advanced airway</li><li>NIPV or HFNC?</li><li>Evidence of shock</li><li>Need for pressor support</li></ul> | Readmission description: <ul style="list-style-type: none"><li>Reason for readmission</li><li>Risk assignment failure?</li><li>ANC at admission</li><li>ANC recovery since FN episode</li><li>Days since last fever</li><li>Concern for infection</li><li>Non-infectious concern (pain, electrolyte, etc.)</li><li>Febrile at admission?</li></ul> Discharge/follow-up description: <ul style="list-style-type: none"><li>Type of follow-up (phone, video, clinic)</li><li>Who did follow up visits (RN, NP, fellow, attending)?</li><li>Frequency</li><li>RN, parent, provider concerns documented</li></ul> | All FN episodes                                               |
| Patient/caregiver mixed methods survey instrument (adapted from                          | Quantitative Items <ul style="list-style-type: none"><li>I can keep up with household tasks</li><li>I am able to spend time with my partner</li><li>I am able to spend time with my other children and/or family</li><li>What is your overall level of concern for your child's health and</li></ul>                                                                                                                                                                        | Qualitative Questions <ul style="list-style-type: none"><li>What are the extra resources and help required to keep your family functioning during fever neutropenia episodes?</li><li>How did this fever neutropenia episode affect members in your family?</li></ul>                                                                                                                                                                                                                                                                                                                                         | 20 episodes, given day <7 of diagnosis (capture readmissions) |

**Orme, et al, 2014)**

condition during this fever neutropenia episode?

- During this fever neutropenia episode, I am confident in my ability to care for my child.
- I am satisfied with the overall care my child received.
- What is your child's overall happiness and wellbeing?
- How would you describe your child's mood?
- How would you describe your child's level of dependence?
- How would you describe your child's appetite?
- How would you describe your child's interest or concentration?
- How would you describe your child's quality of sleep?
- How would you describe your child's activity or energy level?
- How has your child's illness emotionally affected you?
- What is it like caring for your child when they have fever neutropenia?
- How are symptoms different when your child is at home versus in the hospital?
- How have school and work have been affected by your child's illness?
- In your opinion, what is the most important value when your child has fever neutropenia?
- Is there anything else you would like to share about caring for your child during fever neutropenia?
